# Supplementary figures and images for: Crossover of positive and negative magnetoconductance in composites of nanosilica glass containing dual transition metal oxides
Source: Royal Society of Chemistry journal article supplement (doi:10.1039/d1ra02215f), 2021-01-01

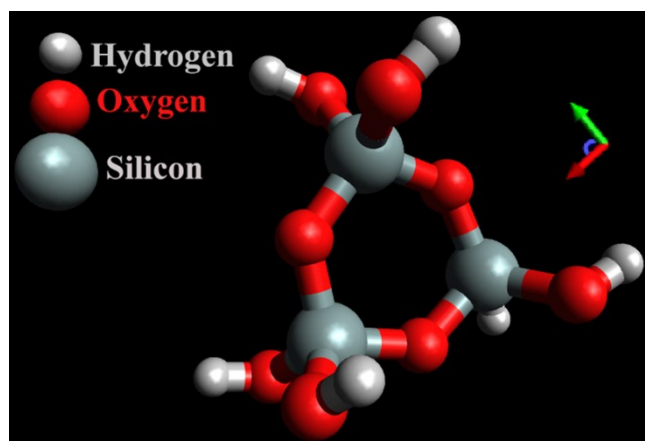

**Figure S1**

Supplement: d1ra02215f1.pdf [file d1ra02215f1.pdf]
